# Supplementary material for: Mechanisms of Dietary Response in Mice and Primates: A Role for EGR1 in Regulating the Reaction to Human-Specific Nutritional Content
Source: PLoS One. 2012 Aug 24;7(8):e43915. doi: 10.1371/journal.pone.0043915 (PMC3427207; doi:10.1371/journal.pone.0043915)
Supplement: Table S3 — Biological processes enriched among genes significantly differentially expressed between livers of mice fed human/chimpanzee diets. (XLS) [file pone.0043915.s014.xls]

## Sheet: BP
Biological processa	testb	controlc	p_valued
alcohol metabolic process	101	88	6.7819e-06
glucose metabolic process	46	27	1.04193e-05
organic acid metabolic process	146	148	1.45983e-05
carboxylic acid metabolic process	142	143	1.54505e-05
sulfur compound metabolic process	35	18	2.80021e-05
monosaccharide metabolic process	58	44	6.63183e-05
cofactor metabolic process	75	64	6.89709e-05
hexose metabolic process	52	38	8.88749e-05
glutathione metabolic process	13	2	0.000143958
generation of precursor metabolites and energy	69	61	0.00025771
aGO categories significantly enriched
bThe number of tested genes that were significantly differentially expressed (FDR<10%) in liver between mice fed human and chimpanzee diets and belong to the tested GO category.
cThe number of control genes that are expressed in the mouse primate diet dataset and belong to the tested GO category but not to the test gene set.
done-sided Fisher's exact test p-values for the GO category being enriched in the test genes relative to the control genes.
