# Supplementary material for: Mechanisms of Dietary Response in Mice and Primates: A Role for EGR1 in Regulating the Reaction to Human-Specific Nutritional Content
Source: PLoS One. 2012 Aug 24;7(8):e43915. doi: 10.1371/journal.pone.0043915 (PMC3427207; doi:10.1371/journal.pone.0043915)
Supplement: Table S4 — Biological processes enriched among genes showing diet effects (using an effect size cutoff) in livers of mice fed human/chimpanzee diets. (XLS) [file pone.0043915.s015.xls]

## Sheet: BP
Biological processa	testb	controlc	p_valued
glucose metabolic process	40	33	4.21987e-10
hexose metabolic process	44	46	6.66476e-09
monosaccharide metabolic process	48	54	6.70624e-09
alcohol metabolic process	73	116	4.03985e-08
cellular carbohydrate metabolic process	64	97	8.19449e-08
cofactor metabolic process	57	82	1.21971e-07
carbohydrate metabolic process	72	129	1.56354e-06
glucose catabolic process	17	9	1.79698e-06
alcohol catabolic process	20	14	2.46767e-06
generation of precursor metabolites and energy	51	79	2.79752e-06
carbohydrate catabolic process	25	23	2.99616e-06
response to chemical stimulus	196	500	4.93912e-06
organic acid metabolic process	95	199	6.59109e-06
NADP metabolic process	12	4	7.36534e-06
carboxylic acid metabolic process	91	194	1.78629e-05
response to organic substance	140	341	2.48681e-05
response to stimulus	298	884	0.000288143
oxidation-reduction process	52	106	0.000529229
response to external stimulus	79	185	0.000672301
glycolysis	10	7	0.000915986
response to hormone stimulus	70	161	0.000927237
aGO categories significantly enriched
bThe number of tested genes that showed diet effects (|effect size|>0.8) in liver between mice fed human and chimpanzee diets and belong to the tested GO category.
cThe number of control genes that are expressed in the mouse primate diet dataset and belong to the tested GO category but not to the test gene set.
done-sided Fisher's exact test p-values for the GO category being enriched in the test genes relative to the control genes.
