# Supplementary material for: Mechanisms of Dietary Response in Mice and Primates: A Role for EGR1 in Regulating the Reaction to Human-Specific Nutritional Content
Source: PLoS One. 2012 Aug 24;7(8):e43915. doi: 10.1371/journal.pone.0043915 (PMC3427207; doi:10.1371/journal.pone.0043915)
Supplement: Table S7 — Biological processes enriched among mouse-specific differentially expressed genes, using an effect size cutoff. (XLS) [file pone.0043915.s018.xls]

## Sheet: BP
Biological processa	testb	controlc	p_valued
cellular ketone metabolic process	33	62	4.79542e-05
response to external stimulus	31	57	6.10472e-05
carboxylic acid metabolic process	32	60	6.13799e-05
organic acid metabolic process	32	62	9.96119e-05
cellular amino acid metabolic process	18	25	0.0002058
mitochondrion organization	14	17	0.000421915
defense response	26	53	0.000855761
aGO categories significantly enriched
bThe number of tested genes that were differentially expressed in liver between mice fed human and chimpanzee diets but not between humans and chimpanzees based on a more equivalent deferential expression cutoff (see methods), and belong to the tested GO category.
cThe number of control genes that are expressed in both the mouse primate diet dataset and the primate dataset, are not differentially expressed between humans and chimpanzees, and belong to the tested GO category but not to the test gene set.
done-sided Fisher's exact test p-values for the GO category being enriched in the test genes relative to the control genes.
